# Supplementary material for: TiO2 nanosheet-anchoring Au nanoplates: high-energy facet and wide spectra surface plasmon-promoting photocatalytic efficiency and selectivity for CO2 reduction
Source: Royal Society of Chemistry journal article supplement (doi:10.1039/c6ra14821b), 2016-01-01
Supplement: c6ra14821b1.pdf [file c6ra14821b1.pdf]

## Supporting Information

### **TiO<sub>2</sub> Nanosheet-Anchoring Au nanoplates: High-energy Facet and Wide Spectra Surface Plasmon-Promoting Photocatalytic Efficiency and Selectivity of CO<sub>2</sub> Reduction**

Meng Wang,<sup>a,b,c,d,†</sup> Qiutong Han,<sup>a,b,c,d,†</sup> Yong Zhou,<sup>\*,a,b,c,d</sup> Ping Li,<sup>a,b,c,d</sup>  
Wenguang Tu,<sup>a,b,c,d</sup> Lanqin Tang,<sup>a,b,c,d,e</sup> Zhigang Zou<sup>\*,a,c,d</sup>

<sup>a</sup>*Jiangsu Key Laboratory for Nano Technology, Nanjing University, Nanjing 210093, P. R. China*

<sup>b</sup>*Key Laboratory of Modern Acoustics, MOE, Institute of Acoustics, School of Physics, Nanjing University, Nanjing 210093, P. R. China*

<sup>c</sup>*Ecomaterials and Renewable Energy Research Center (ERERC), Nanjing University, Nanjing, Jiangsu 210093, P. R. China*

<sup>d</sup>*National Laboratory of Solid State Microstructures, Collaborative Innovation Center of Advanced Microstructures, Nanjing University, Nanjing 210093, P. R. China*

<sup>e</sup>*College of Chemistry and Chemical Engineering, Yangcheng Institute of Technology, Yancheng 22401, P. R. China*

† W. M. and H. Q. contribute equally to this work.

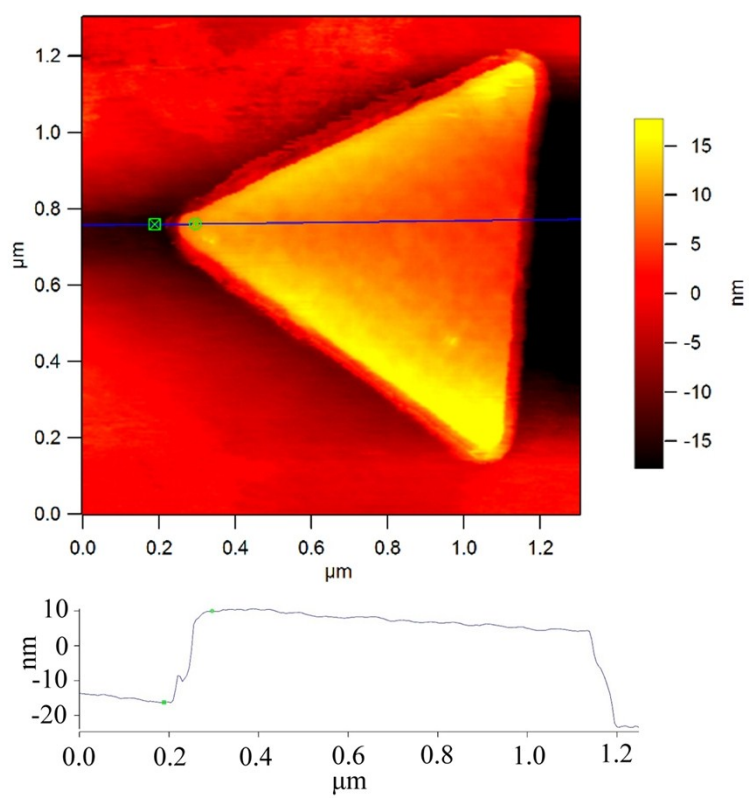

**Figure S1.** AFM image of a single Au nanoplate.

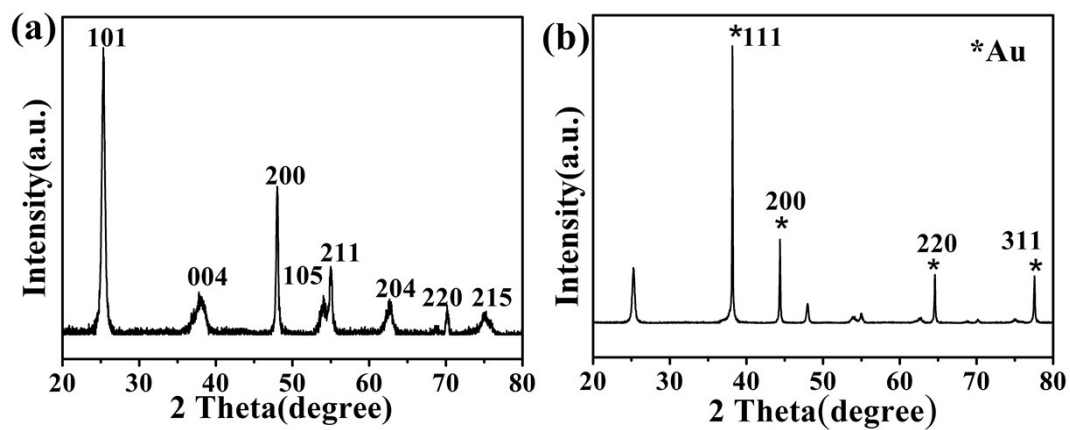

**Figure S2.** XRD pattern of TiO<sub>2</sub> nanosheets and Au-TiO<sub>2</sub> nanocomposites.

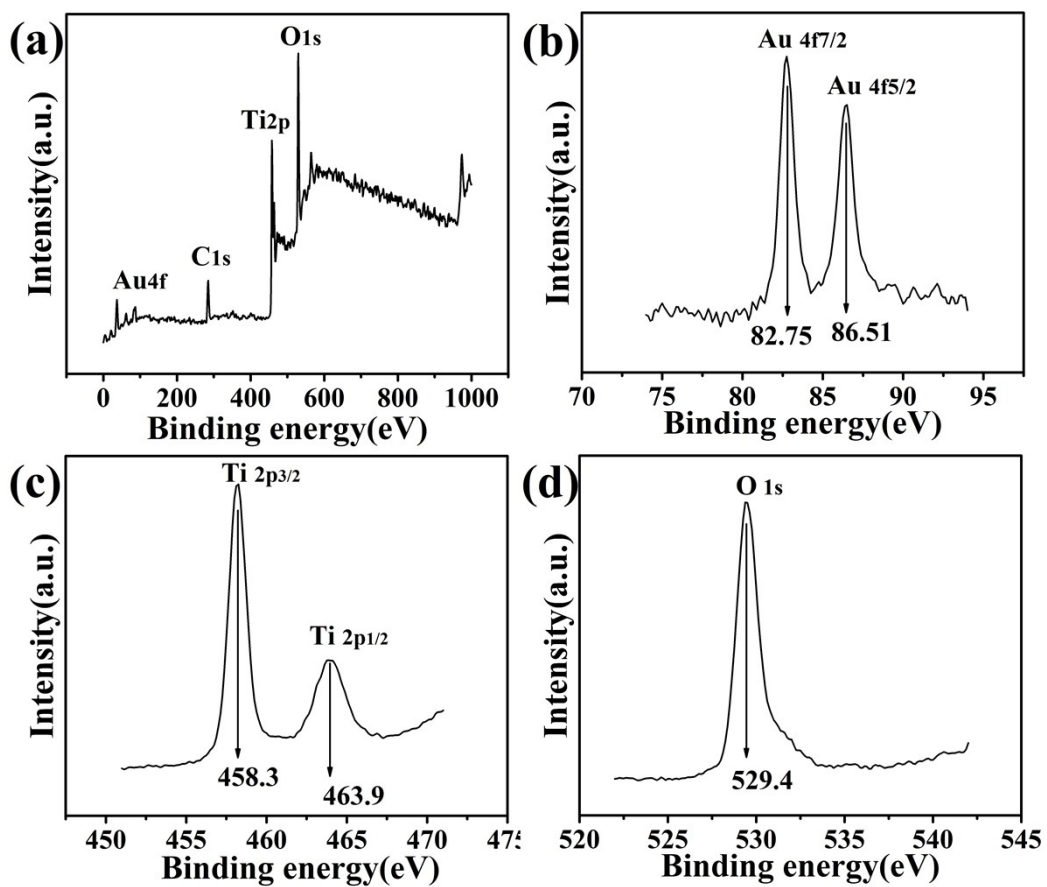

Figure S3 XPS spectrum of Au-TiO<sub>2</sub> composites.
